# Supplementary material
Source: Frontiers journal article supplement (https://www.frontiersin.org/articles/254232)
Supplement: Image_1.PDF [file Image_1.PDF]

## Supplementary Material

### Control of Absence Seizures by the Thalamic Feed-forward Inhibition

Mingming Chen<sup>1,†</sup>, Daqing Guo<sup>1,2,\*,†</sup>, Yang Xia<sup>1,2</sup>, Dezhong Yao<sup>1,2,\*</sup>

\* Correspondence: Daqing Guo ([dqguo@uestc.edu.cn](mailto:dqguo@uestc.edu.cn))

Dezhong Yao ([dyao@uestc.edu.cn](mailto:dyao@uestc.edu.cn))

#### Supplementary Figures

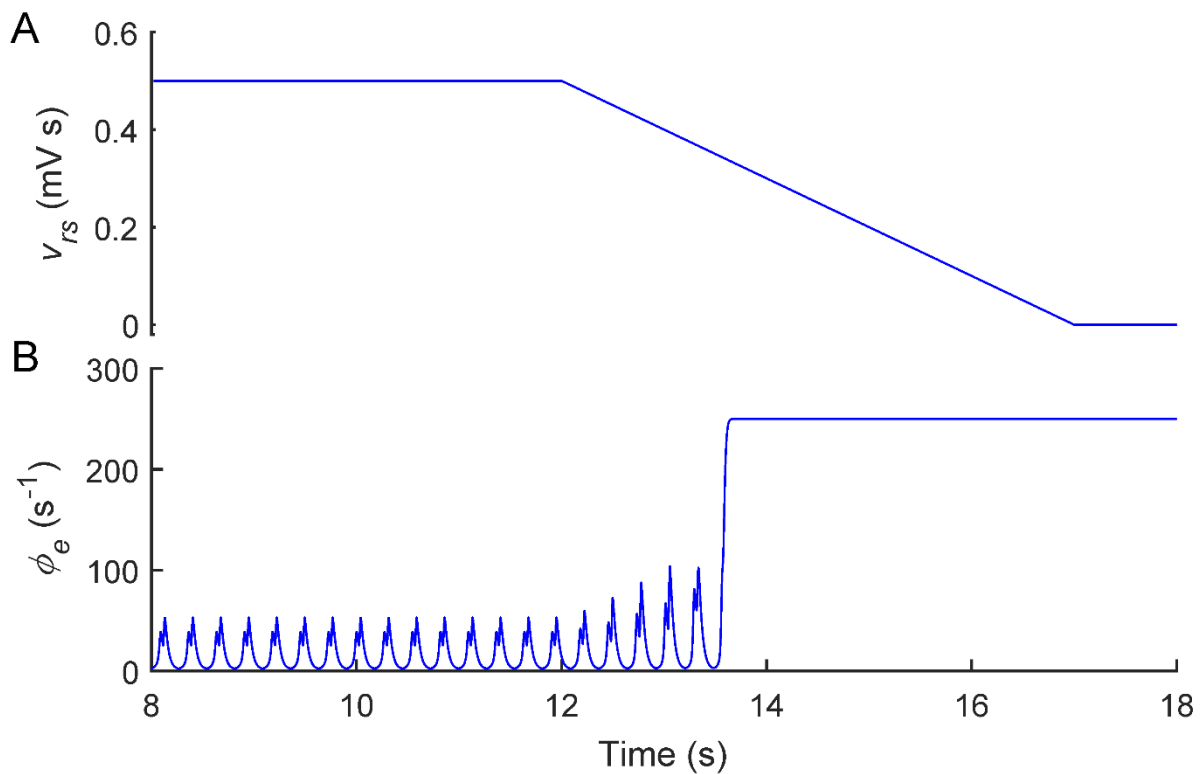

**Supplementary Figure 1.** The effects of decreasing the coupling strength  $v_{rs}$  on controlling absence seizures. (A) Linearly decreasing the coupling strength  $v_{rs}$ . (B) The cortical firing patterns change from SWD oscillation state to saturation firing state with  $v_{rs}$  decreasing to 0.
